# Supplementary material
Source: PubMed Central journal article supplement (PMC8102308)
Supplement: NIHMS1655664-supplement-1.pdf [file NIHMS1655664-supplement-1.pdf]

**A**

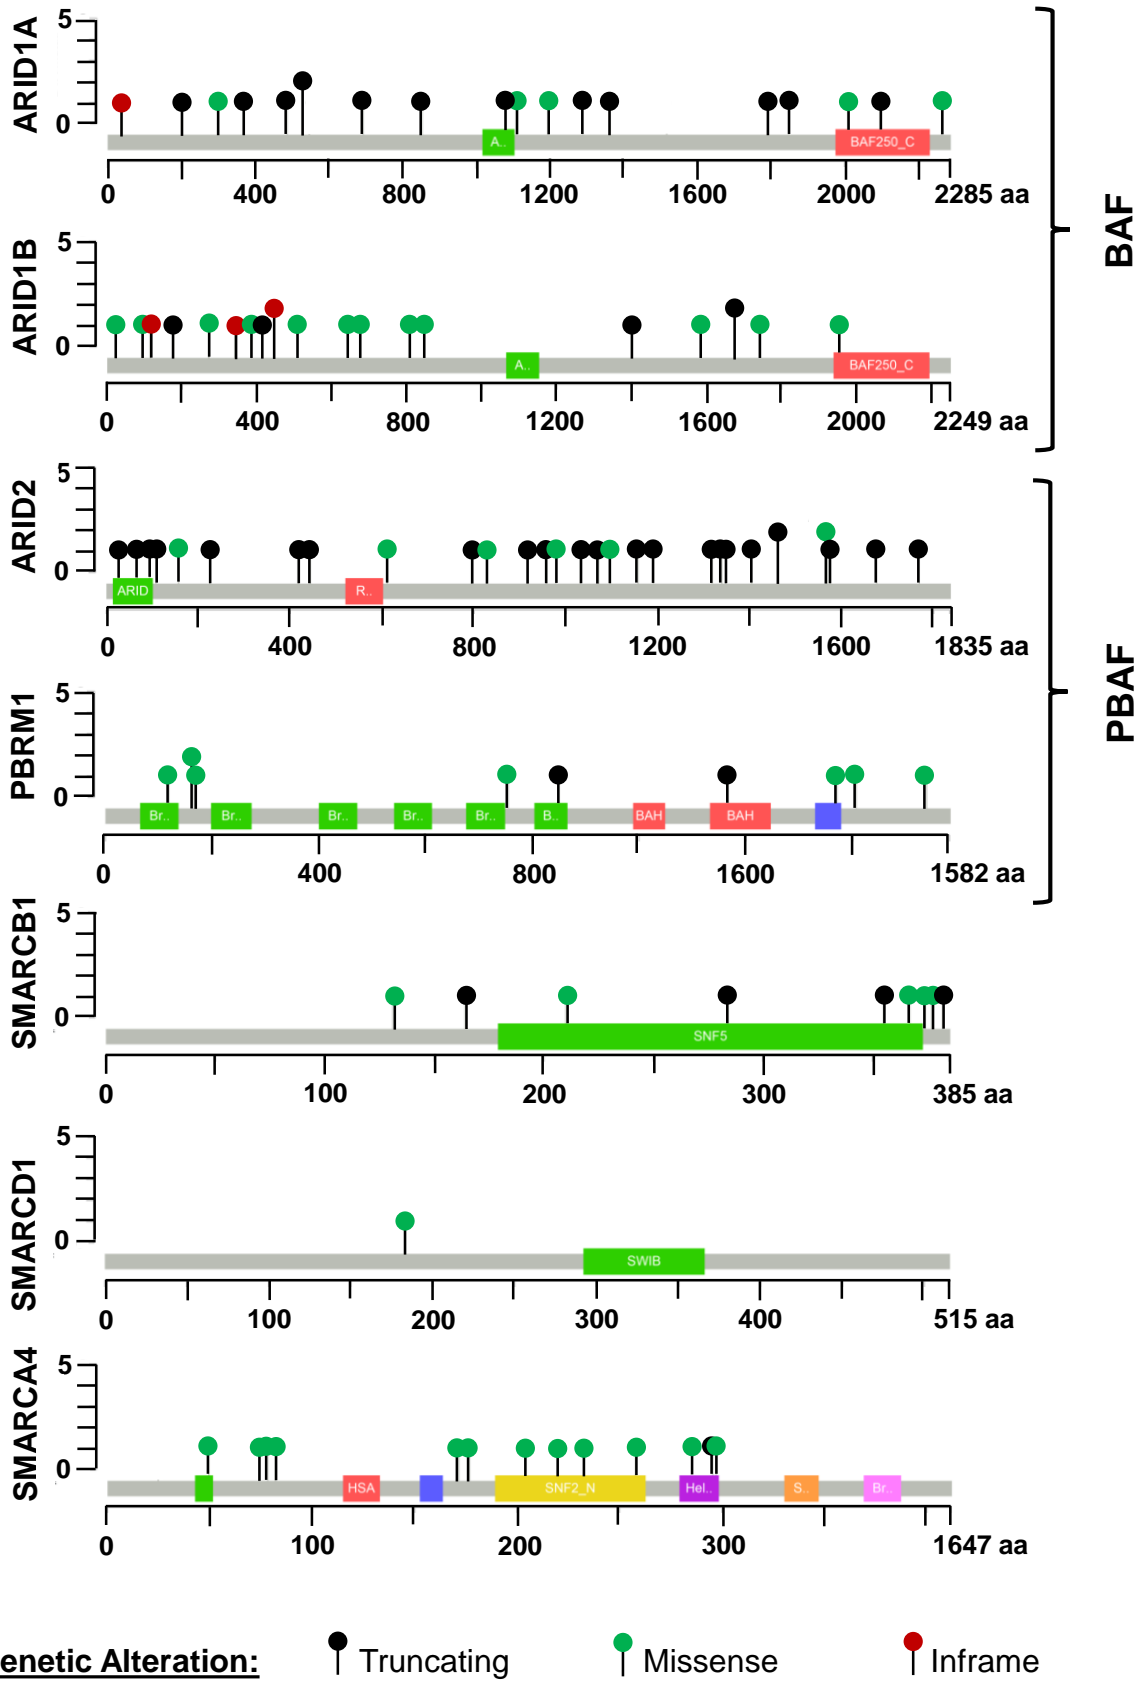

**Supplementary Figure S1: SWI/SNF alterations in human thyroid cancers.** (A) Lollipop plots showing distribution of SWI/SNF subunit gene mutations.
