# Supplementary material
Source: PubMed Central journal article supplement (PMC8102308)
Supplement: NIHMS1655664-supplement-3.pdf [file NIHMS1655664-supplement-3.pdf]

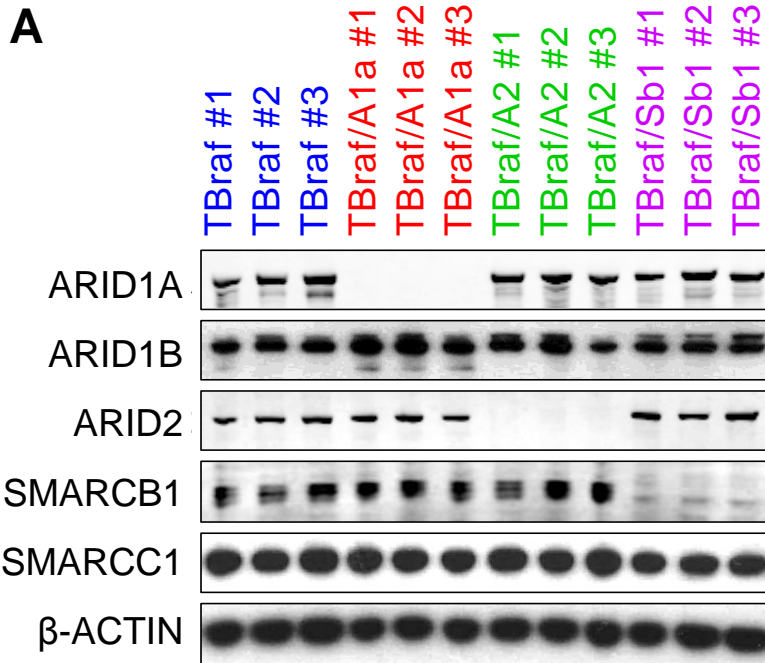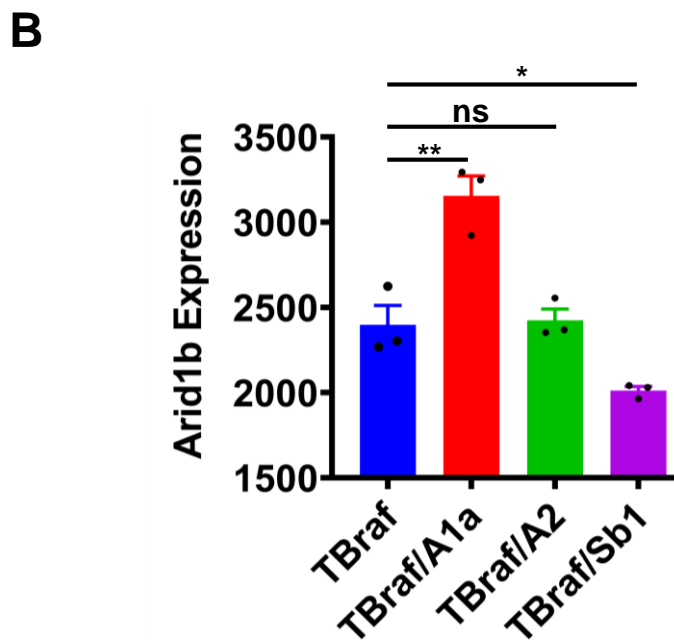

**Supplementary Figure S3: Validation of tumor derived *TBras*, *TBras/A1a*, *TBras/A2* and *TBras/Sb1* cell lines.** (A) Western blotting of three independent cell lines derived from tumors of the indicated genotype. (B) Arid1b mRNA expression levels in thyroid tumors of the indicated genotype (n=3; Mean ± SEM; \*  $p < 0.05$ , \*\*  $p < 0.01$ , ns: not significant vs *TBras*; unpaired two-tailed Student's *t*-test).
