# Supplementary material
Source: PubMed Central journal article supplement (PMC8102308)
Supplement: NIHMS1655664-supplement-6.pdf [file NIHMS1655664-supplement-6.pdf]

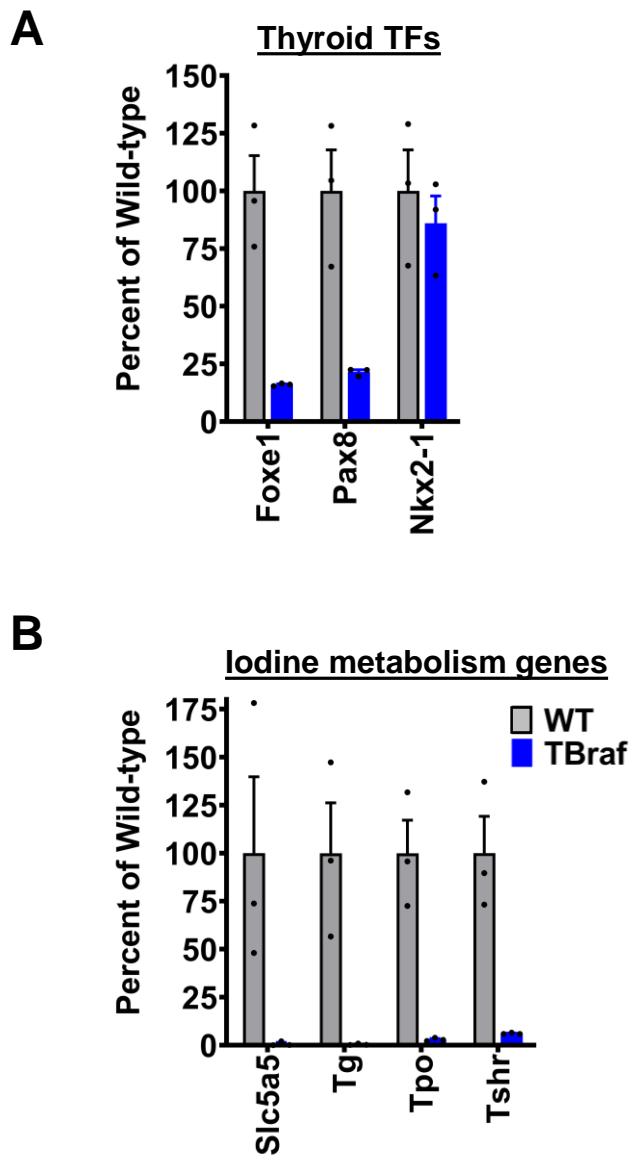

**Supplementary Figure S6: Effects of *Braf*<sup>V600E</sup> on thyroid differentiation.** Thyroid tissue lineage transcription factor (A) and iodine metabolism (B) gene expression in *TBraf* mice by RNAseq compared to WT.
