# Supplementary material
Source: PubMed Central journal article supplement (PMC8102308)
Supplement: NIHMS1655664-supplement-7.pdf [file NIHMS1655664-supplement-7.pdf]

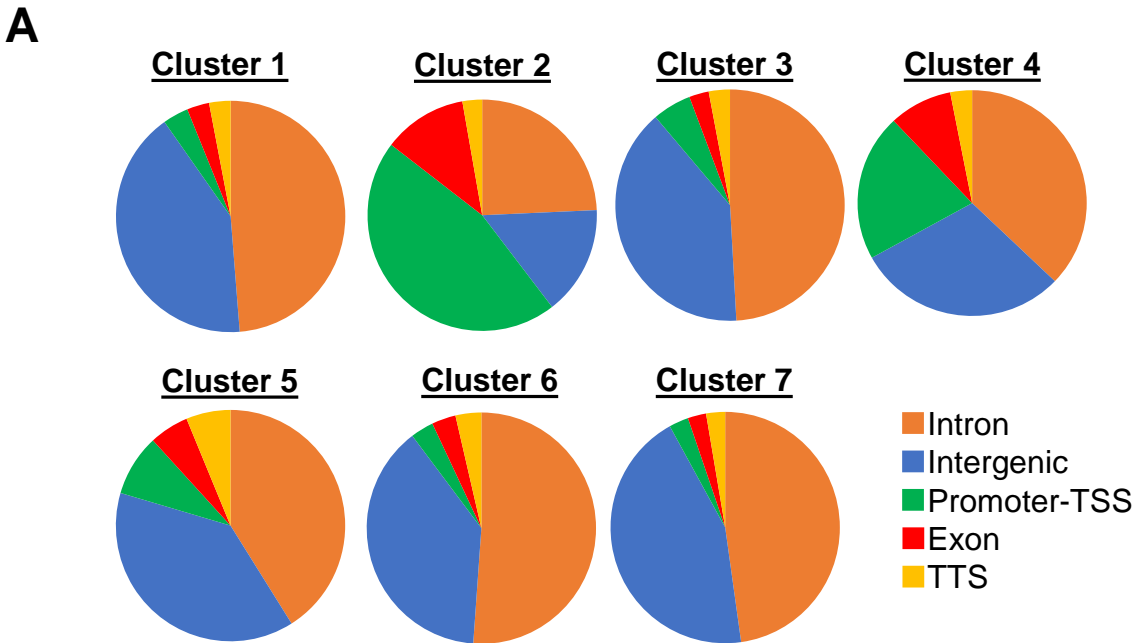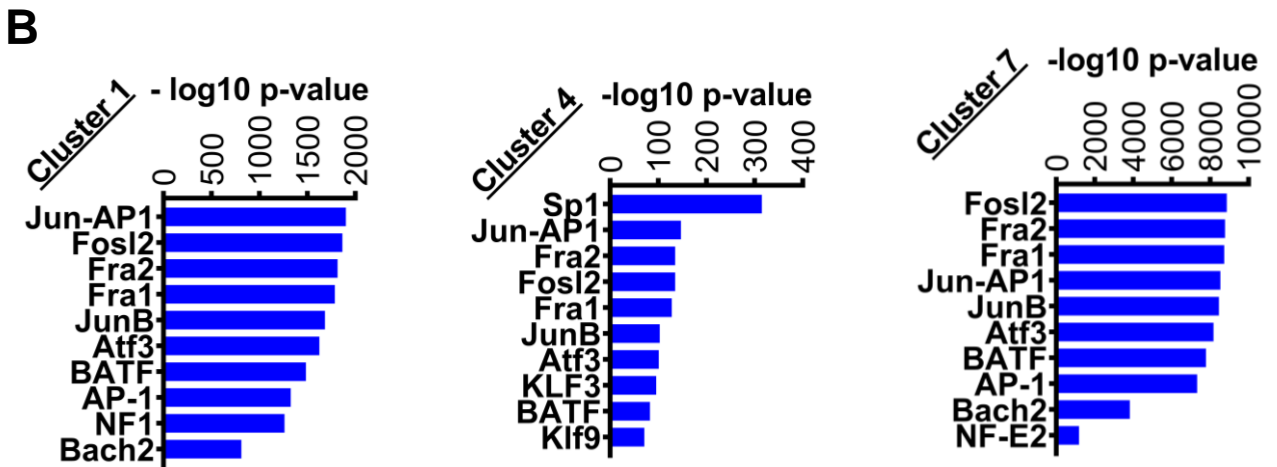

**Supplementary Figure S7: Impact of acute MAPK blockade on chromatin accessibility in *Tbraf* and *Tbraf*/*Swi-Snf* deficient tumors.** (A) Genomic annotations of the differential ATAC peaks present in the 7 clusters. (B) Top 10 TF motifs enriched in clusters 1, 4 and 7. The other cluster TF motifs are shown in Fig. 4F.
