# Supplementary material
Source: PubMed Central journal article supplement (PMC8102308)
Supplement: NIHMS1655664-supplement-9.pdf [file NIHMS1655664-supplement-9.pdf]

**A**

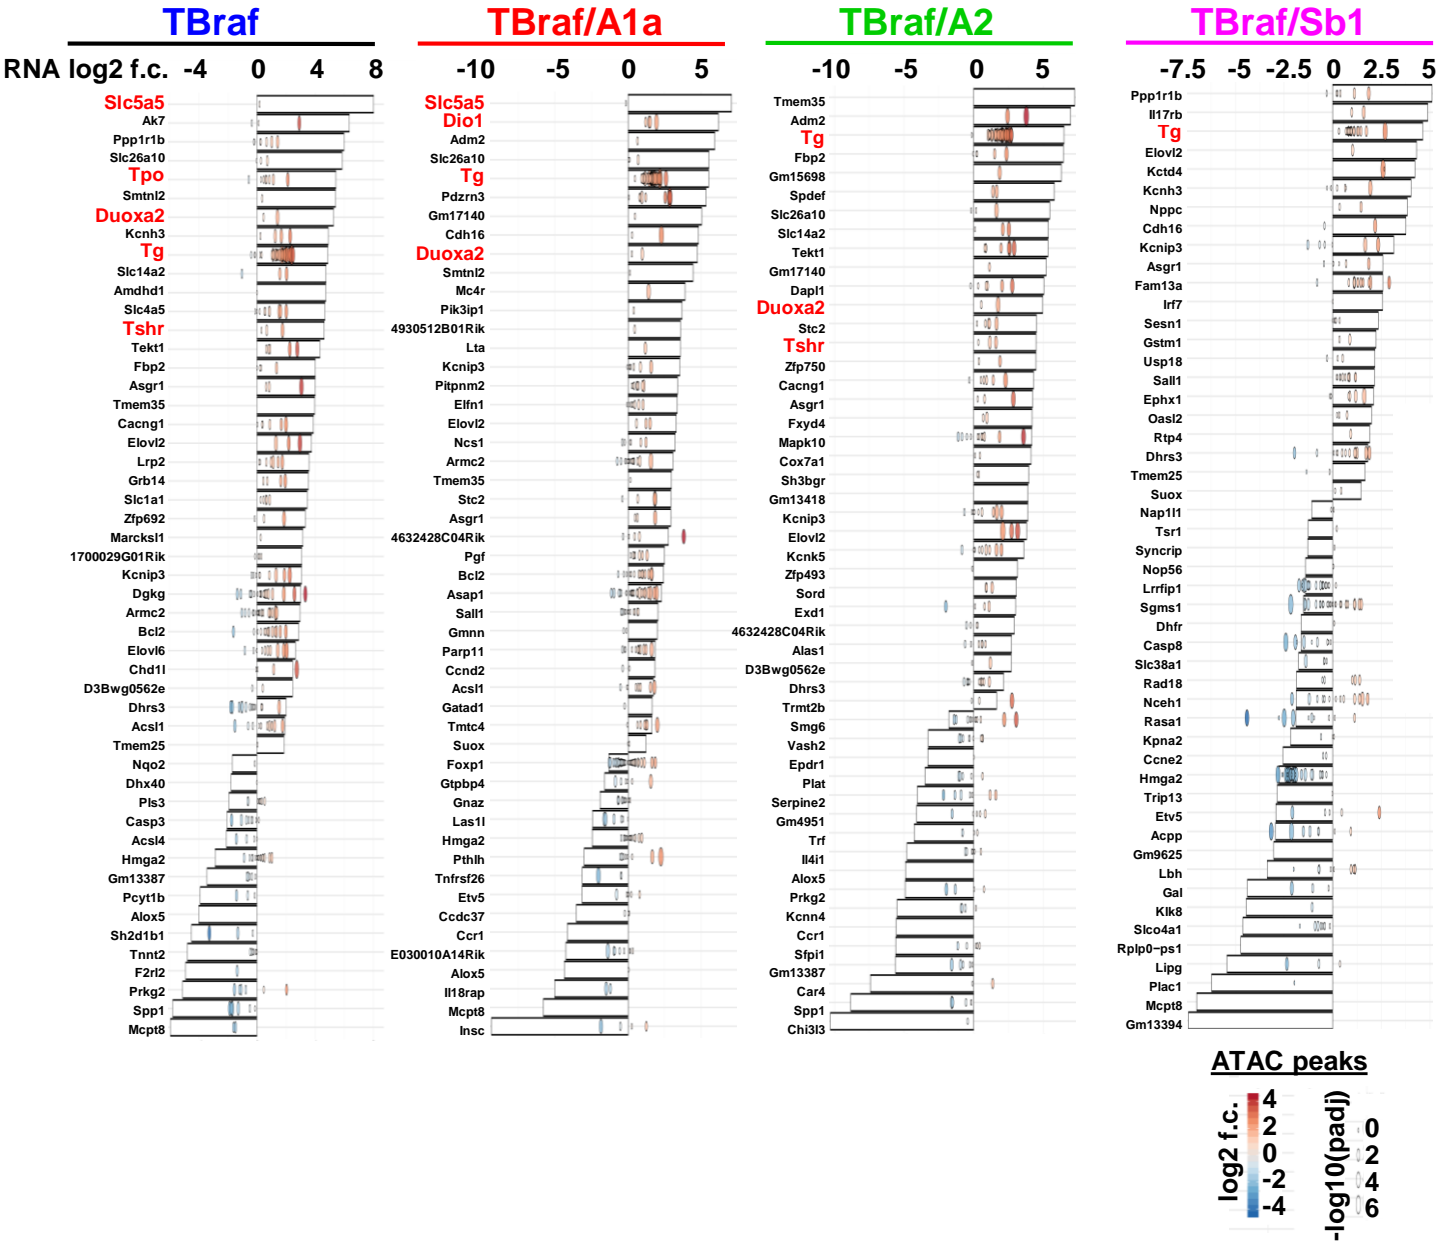

**Supplementary Figure S9: Effects of MEK inhibition on chromatin accessibility and thyroid differentiated gene expression in Braf-mutant cancers with homozygous loss of Swi/Snf subunit genes.** (A) Waterfall plots of RNA-seq log<sub>2</sub> fold change of the top 50 genes up- or down-regulated by CKI treatment compared to vehicle-treated tumor cells. Changes in chromatin accessibility defined by ATAC-seq upon CKI treatment are shown as colored circles (red = increased accessibility; blue = decreased accessibility; shade and size of circles represent magnitude and p-value of the effect respectively).
