# Supplementary material
Source: PubMed Central journal article supplement (PMC8102308)
Supplement: NIHMS1655664-supplement-12.pdf [file NIHMS1655664-supplement-12.pdf]

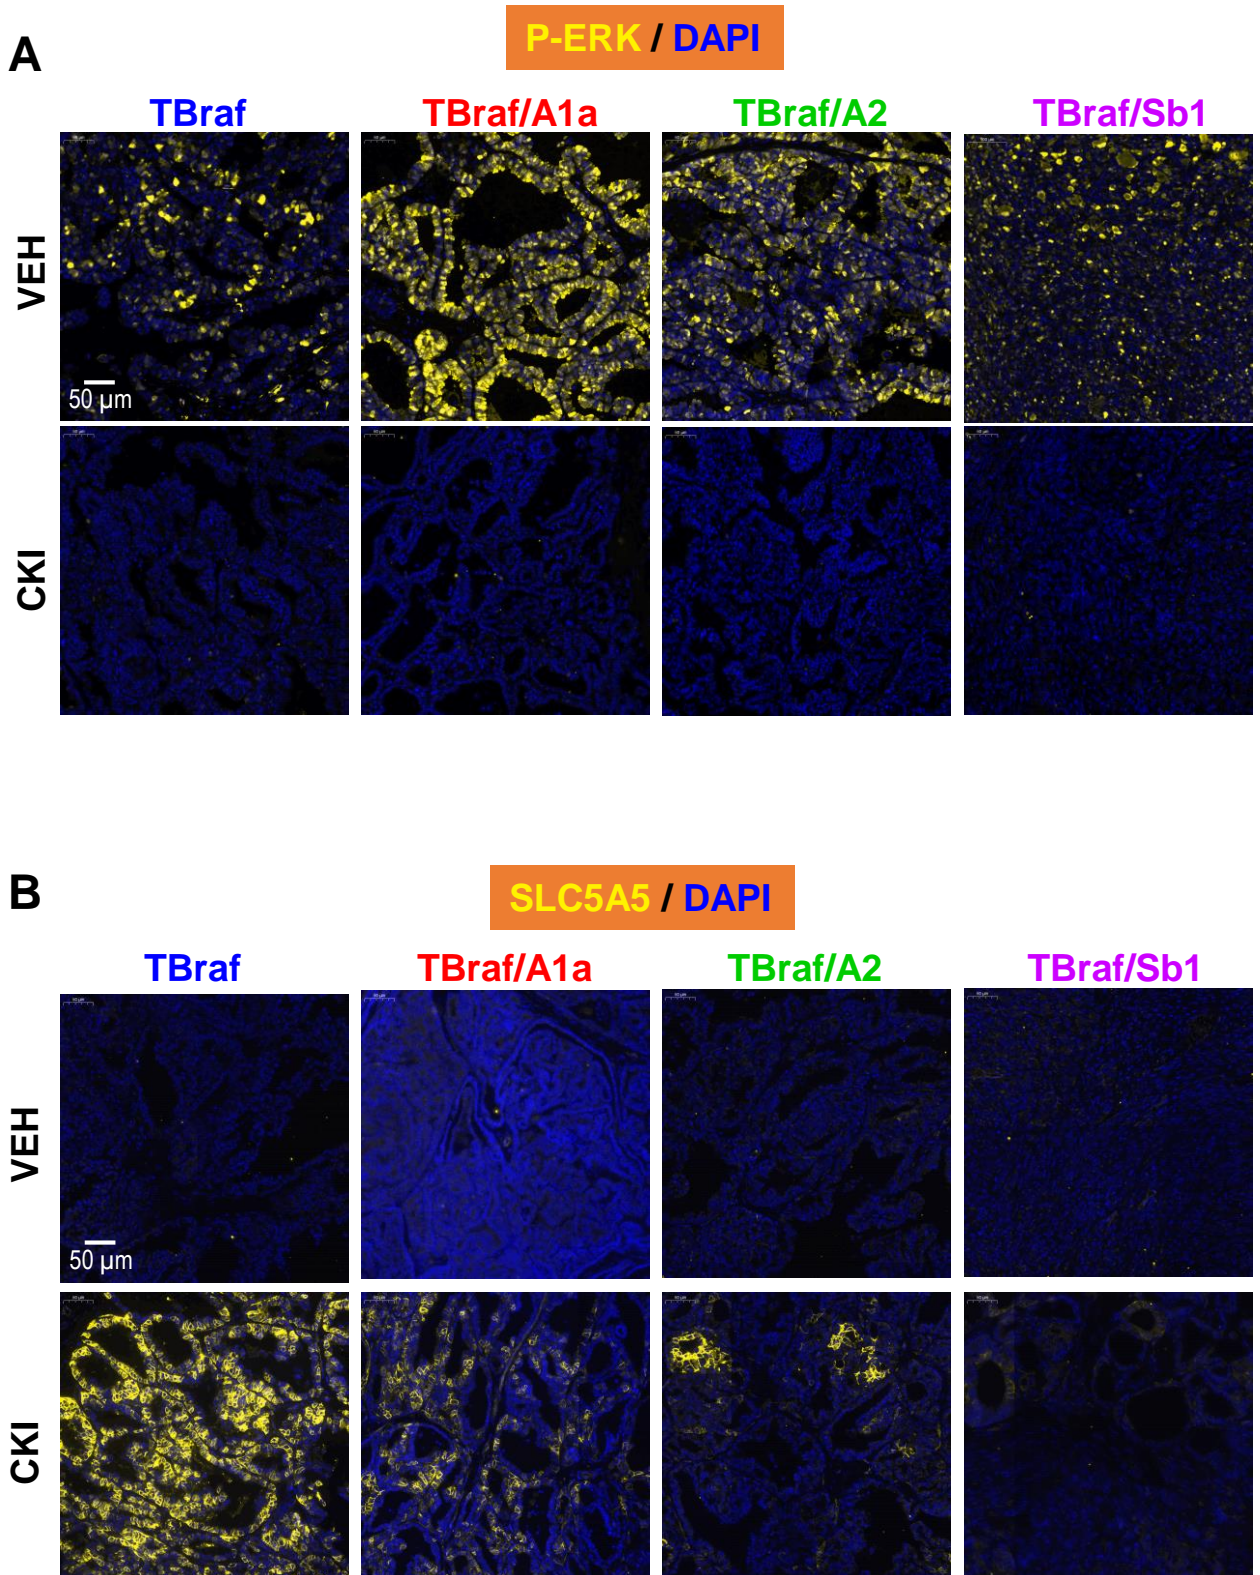

**Supplementary Figure S12: Restoration of Nis (SLC5A5) expression upon MEK inhibition is attenuated in Braf-tumors with Swi/Snf loss.** Representative images of pERK (A) and SLC5A5 (B) immunofluorescence staining of thyroid tumors from mice of the indicated genotypes treated with or without CKI.
