# Supplementary material
Source: PubMed Central journal article supplement (PMC8102308)
Supplement: NIHMS1655664-supplement-13.pdf [file NIHMS1655664-supplement-13.pdf]

**A****NCT02456701**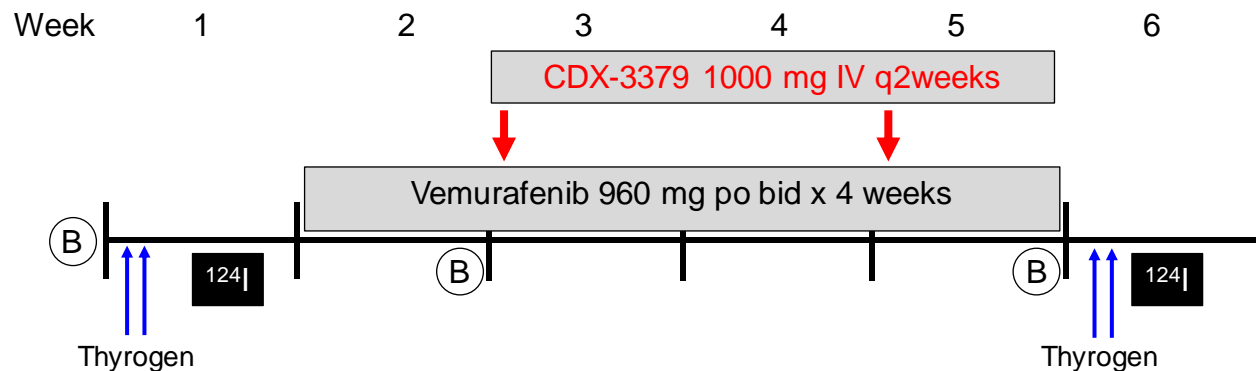**B****NCT02152995**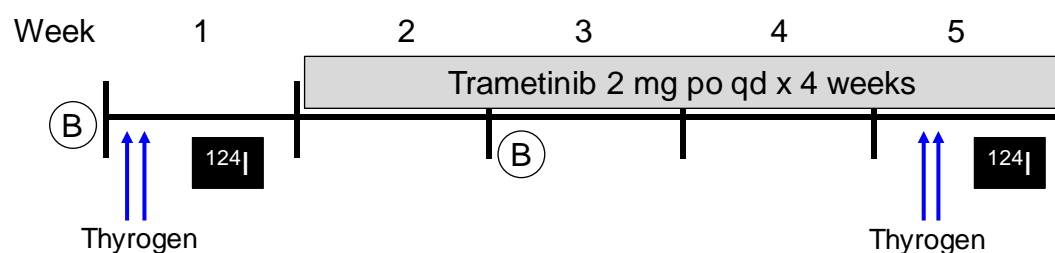**C**

| Trial       | Patient | Classification | Driver mutation | SWI/SNF mutation     | Other mutations                                                           |
|-------------|---------|----------------|-----------------|----------------------|---------------------------------------------------------------------------|
| NCT02456701 | P1      | Responder      | BRAF V600E      | --                   | TERT, CD274 L190V                                                         |
|             | P2      | Non-responder  | BRAF V600E      | ARID2 Q1318*, Q1462* | APC P119A, HIS1H3D E98Q, MDC1 P342S, TERT, TSHR V558M                     |
| NCT02152995 | P3      | Responder      | HRAS Q61R       | --                   | EIF1AX X113_splice, TERT                                                  |
|             | P4      | Non-responder  | NRAS Q61R       | ARID1A S1791*        | NKX2-1 amp, TBX3 amp                                                      |
|             | P5      | Non-responder  | NRAS Q61K       | SMARCB1 HOMDEL       | SH2B3, CHEK2, NF2, EP300, CRKL, MAPK1, RAC2 DeepDel (22q11-12, 12q24 del) |
|             | P6      | Non-responder  | NRAS Q61R       | SMARCB1 D367E        | TERT, VHL R167Q                                                           |

**Supplementary Figure S13: Schema of redifferentiation trials.** (A) Schema of redifferentiation trial [NCT02456701](#) in patients with *BRAF*-mutant RAI refractory thyroid cancers. After a baseline rTSH-stimulated  $^{124}\text{I}$  PET scan, patients were treated with vemurafenib orally for 5 weeks combined with CDX-3379 administered intravenously every 2 weeks starting the second week of treatment. Patients were re-evaluated with a second rTSH-stimulated  $^{124}\text{I}$  PET scan while on the drug combination. Research biopsies (B) were performed before treatment, on vemurafenib, and on vemurafenib + CDX-3379. (B) Schema of the redifferentiation trial design [NCT02152995](#) in patients with *RAS*-mutant RAI refractory thyroid cancers. After a baseline rTSH-stimulated  $^{124}\text{I}$  PET scan, patients were treated for 4 weeks with trametinib and re-evaluated with a second  $^{124}\text{I}$  PET scan. (C) Mutational profiles of thyroid cancer patients shown in Fig 6.
